# Supplementary material
Source: MDPI journal article supplement (https://www.mdpi.com/1660-4601/11/7/6955)
Supplement: s1 [file s1]

Supplementary Information

## Nitrogen Removal over Nitrite by Aeration Control in Aerobic Granular Sludge Sequencing Batch Reactors. *Int. J. Environ. Res. Public Health* 2014, 11

Samuel Lochmatter, Julien Maillard and Christof Holliger \*

Laboratory for Environmental Biotechnology, School of Architecture, Civil and Environmental Engineering, Ecole Polytechnique Fédérale de Lausanne (EPFL), 1015 Lausanne, Switzerland; E-Mails: samuel.lochmatter@epfl.ch (S.L.); julien.maillard@epfl.ch (J.M.)

\* To whom correspondence should be addressed; E-Mail: christof.holliger@epfl.ch; Tel.: +41-21-693-47-24; Fax: +41-21-693-47-22.

**Table S1.** Parameters for individual quantitative PCR runs. B and M are the parameters of the linear calibration curve, B is the constant and M the slope.

| Parameters     | Run 1  | Run 2  | Run 3  | Run 4  | Run 5  | Run 6  | Run 7  |
|----------------|--------|--------|--------|--------|--------|--------|--------|
| B              | 33.289 | 33.735 | 36.637 | 37.055 | 37.379 | 31.605 | 35.612 |
| M              | -3.537 | -3.438 | -3.446 | -3.422 | -3.542 | -3.434 | -3.514 |
| Efficiency     | 0.917  | 0.954  | 0.951  | 0.960  | 0.916  | 0.955  | 0.926  |
| R <sup>2</sup> | 0.999  | 0.998  | 0.998  | 0.994  | 0.997  | 0.997  | 0.998  |

**Table S2.** *Nitrospira* 16S rRNA gene concentrations analyzed by qPCR under different aeration conditions during the study period of 261 days.

| Reactor        | Aeration Strategy       | TempErature | Day | <i>Nitrospira</i> (cn ng <sup>-1</sup> of DNA) |
|----------------|-------------------------|-------------|-----|------------------------------------------------|
| Parent reactor | alternating high-low DO | 20 °C       | 0   | 1779                                           |
|                | alternating high-low DO | 20 °C       | 42  | 4583                                           |
|                | alternating high-low DO | 20 °C       | 62  | 781                                            |
|                | alternating high-low DO | 20 °C       | 75  | 919                                            |
|                | alternating high-low DO | 20 °C       | 83  | 458                                            |
|                | alternating high-low DO | 20 °C       | 92  | 76                                             |
|                | alternating high-low DO | 20 °C       | 125 | 26                                             |
|                | alternating high-low DO | 20 °C       | 140 | 95                                             |
| Reactor 1      | alternating high-low DO | 20 °C       | 152 | 107                                            |
|                | alternating high-low DO | 15 °C       | 170 | 78                                             |
|                | alternating high-low DO | 15 °C       | 182 | 45                                             |
|                | constant high DO        | 15 °C       | 191 | 40                                             |

Table S2. Cont.

| Reactor   | Aeration Strategy       | TempERature | Day | Nitrospira (cn ng <sup>-1</sup> of DNA) |
|-----------|-------------------------|-------------|-----|-----------------------------------------|
| Reactor 2 | constant high DO        | 15 °C       | 201 | 545                                     |
|           | constant high DO        | 15 °C       | 212 | 586                                     |
|           | constant high DO        | 15 °C       | 217 | 1936                                    |
|           | intermittent aeration   | 15 °C       | 232 | 810                                     |
|           | intermittent aeration   | 15 °C       | 251 | 303                                     |
|           | intermittent aeration   | 15 °C       | 254 | 230                                     |
|           | intermittent aeration   | 15 °C       | 258 | 337                                     |
|           | alternating high-low DO | 20 °C       | 170 | 75                                      |
|           | alternating high-low DO | 20 °C       | 182 | 91                                      |
|           | constant high DO        | 20 °C       | 191 | 163                                     |
|           | constant high DO        | 20 °C       | 201 | 203                                     |
|           | constant high DO        | 20 °C       | 212 | 207                                     |
|           | constant high DO        | 20 °C       | 217 | 473                                     |
|           | intermittent aeration   | 20 °C       | 232 | 168                                     |
|           | intermittent aeration   | 20 °C       | 251 | 99                                      |
|           | intermittent aeration   | 20 °C       | 254 | 87                                      |
|           | intermittent aeration   | 20 °C       | 258 | 86                                      |

Figure S1. Comparison between gas chromatography and microsensor measurements for nitrous oxide in the gas phase.

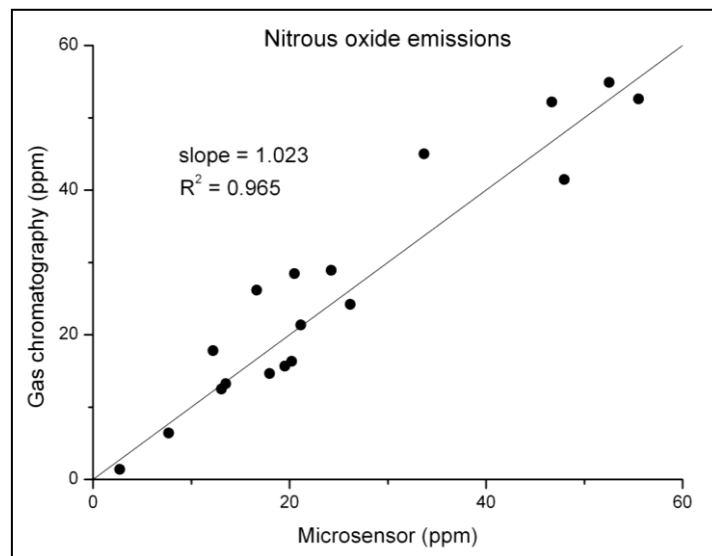

**Figure S2.** Nutrient removal during SBR cycles operated at day 258 for reactor A (20 °C) and reactor B (15 °C) with intermittent aeration. Nutrient concentrations at time 0 were calculated based on the effluent concentrations of the previous cycle and the influent concentrations. Aeration started after 60 min of plug-flow feeding (indicated by the vertical dashed line). The dotted lines show schematically the aeration strategy.

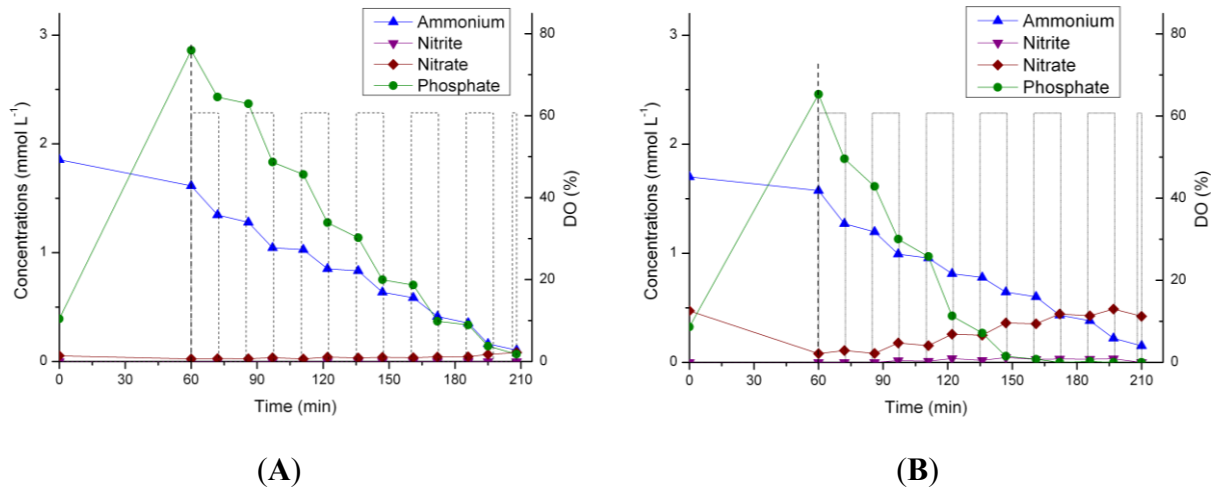

© 2014 by the authors; licensee MDPI, Basel, Switzerland. This article is an open access article distributed under the terms and conditions of the Creative Commons Attribution license (<http://creativecommons.org/licenses/by/3.0/>).
